# Supplementary material for: A0.5H2C6N7O3·4H2O (A = Ca2+, Sr2+) iso-cyamelurates with ultra-large π-conjugated group and excellent nonlinear optical properties
Source: Royal Society of Chemistry journal article supplement (doi:10.1039/d3qi01251d), 2023-01-01
Supplement: d3qi01251d1.pdf [file d3qi01251d1.pdf]

## Supporting Information

### **$A_{0.5}H_2C_6N_7O_3 \cdot 4H_2O$ ( $A = Ca^{2+}, Sr^{2+}$ ) iso-cyamelurates with ultra-large $\pi$ -conjugated group and excellent nonlinear optical properties**

*Xiaoguang Du,<sup>a</sup> Fangyan Wang,<sup>b</sup> Fei Liang,<sup>b,\*</sup> Zhanggui Hu,<sup>a</sup> Yicheng Wu,<sup>a,b</sup> Xinyuan Zhang<sup>a,\*</sup>*

<sup>a</sup> Tianjin Key Laboratory of Functional Crystal Materials, Institute of Functional Crystals, Tianjin University of Technology, Tianjin 300384, China.

<sup>b</sup> State Key Laboratory of Crystal Materials and Institute of Crystal Materials, Shandong University, Jinan 250100, China.

## Contents

**Figure S1.** Powder X-ray diffraction pattern of (a)  $\text{Ca}_{0.5}\text{H}_2\text{C}_6\text{N}_7\text{O}_3\cdot 4\text{H}_2\text{O}$  and (b)  $\text{Sr}_{0.5}\text{H}_2\text{C}_6\text{N}_7\text{O}_3\cdot 4\text{H}_2\text{O}$ .

**Figure S2** Crystal structure of  $\text{Sr}_{0.5}\text{H}_2\text{C}_6\text{N}_7\text{O}_3\cdot 4\text{H}_2\text{O}$  (**II**). (a) The coordination environment of  $\text{Sr}^{2+}$ ; (b) the arrangement of  $(\text{H}_2\text{C}_6\text{N}_7\text{O}_3)^-$  anions; (c) the packing diagram of  $\text{Sr}_{0.5}\text{H}_2\text{C}_6\text{N}_7\text{O}_3\cdot 4\text{H}_2\text{O}$ .

**Figure S3.** Thermal analysis curves of (a)  $\text{Ca}_{0.5}\text{H}_2\text{C}_6\text{N}_7\text{O}_3\cdot 4\text{H}_2\text{O}$  and (b)  $\text{Sr}_{0.5}\text{H}_2\text{C}_6\text{N}_7\text{O}_3\cdot 4\text{H}_2\text{O}$ .

**Figure S4.** Photoluminescent measurement of  $\text{Ca}_{0.5}\text{H}_2\text{C}_6\text{N}_7\text{O}_3\cdot 4\text{H}_2\text{O}$ .

**Figure S5.** Birefringence measurement of  $\text{Ca}_{0.5}\text{H}_2\text{C}_6\text{N}_7\text{O}_3\cdot 4\text{H}_2\text{O}$ .

**Figure S6.** Birefringence measurement of  $\text{Sr}_{0.5}\text{H}_2\text{C}_6\text{N}_7\text{O}_3\cdot 4\text{H}_2\text{O}$ .

**Figure S7.** Calculated band structure of (a)  $\text{Ca}_{0.5}\text{H}_2\text{C}_6\text{N}_7\text{O}_3\cdot 4\text{H}_2\text{O}$  and (b)  $\text{Sr}_{0.5}\text{H}_2\text{C}_6\text{N}_7\text{O}_3\cdot 4\text{H}_2\text{O}$ .

**Table S1.** Fractional atomic coordinates ( $\times 10^4$ ) and equivalent isotropic displacement parameters ( $\text{\AA}^2 \times 10^3$ ) for  $\text{Ca}_{0.5}\text{H}_2\text{C}_6\text{N}_7\text{O}_3\cdot 4\text{H}_2\text{O}$ .

**Table S2.** Fractional atomic coordinates ( $\times 10^4$ ) and equivalent isotropic displacement parameters ( $\text{\AA}^2 \times 10^3$ ) for  $\text{Sr}_{0.5}\text{H}_2\text{C}_6\text{N}_7\text{O}_3\cdot 4\text{H}_2\text{O}$ .

**Table S3.** Anisotropic displacement parameters ( $\text{\AA}^2 \times 10^3$ ) for  $\text{Ca}_{0.5}\text{H}_2\text{C}_6\text{N}_7\text{O}_3\cdot 4\text{H}_2\text{O}$ .

**Table S4.** Anisotropic displacement parameters ( $\text{\AA}^2 \times 10^3$ ) for  $\text{Sr}_{0.5}\text{H}_2\text{C}_6\text{N}_7\text{O}_3\cdot 4\text{H}_2\text{O}$ .

**Table S5.** Selected bond lengths for  $\text{Ca}_{0.5}\text{H}_2\text{C}_6\text{N}_7\text{O}_3\cdot 4\text{H}_2\text{O}$ .

**Table S6.** Selected bond lengths for  $\text{Sr}_{0.5}\text{H}_2\text{C}_6\text{N}_7\text{O}_3\cdot 4\text{H}_2\text{O}$ .

**Table S7.** Selected bond angles for  $\text{Ca}_{0.5}\text{H}_2\text{C}_6\text{N}_7\text{O}_3\cdot 4\text{H}_2\text{O}$ .

**Table S8.** Selected bond angles for  $\text{Sr}_{0.5}\text{H}_2\text{C}_6\text{N}_7\text{O}_3\cdot 4\text{H}_2\text{O}$ .

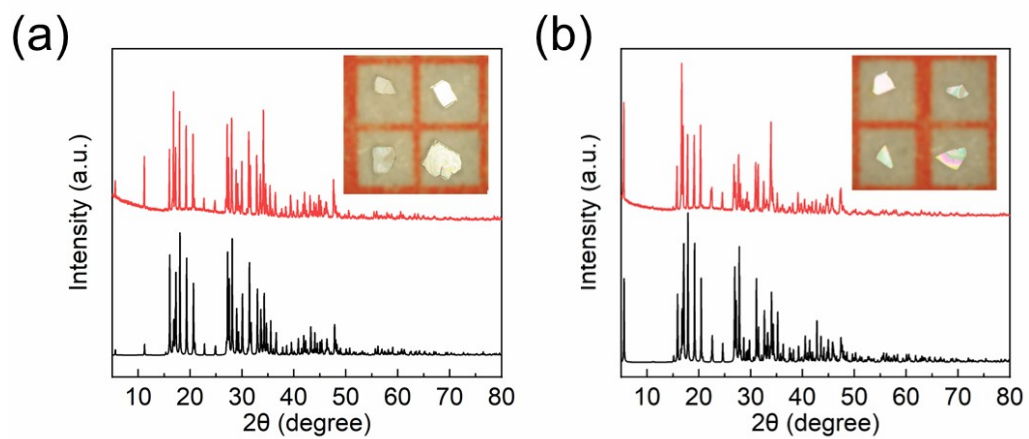

**Figure S1.** Powder X-ray diffraction pattern of (a)  $\text{Ca}_{0.5}\text{H}_2\text{C}_6\text{N}_7\text{O}_3 \cdot 4\text{H}_2\text{O}$  and (b)  $\text{Sr}_{0.5}\text{H}_2\text{C}_6\text{N}_7\text{O}_3 \cdot 4\text{H}_2\text{O}$ .

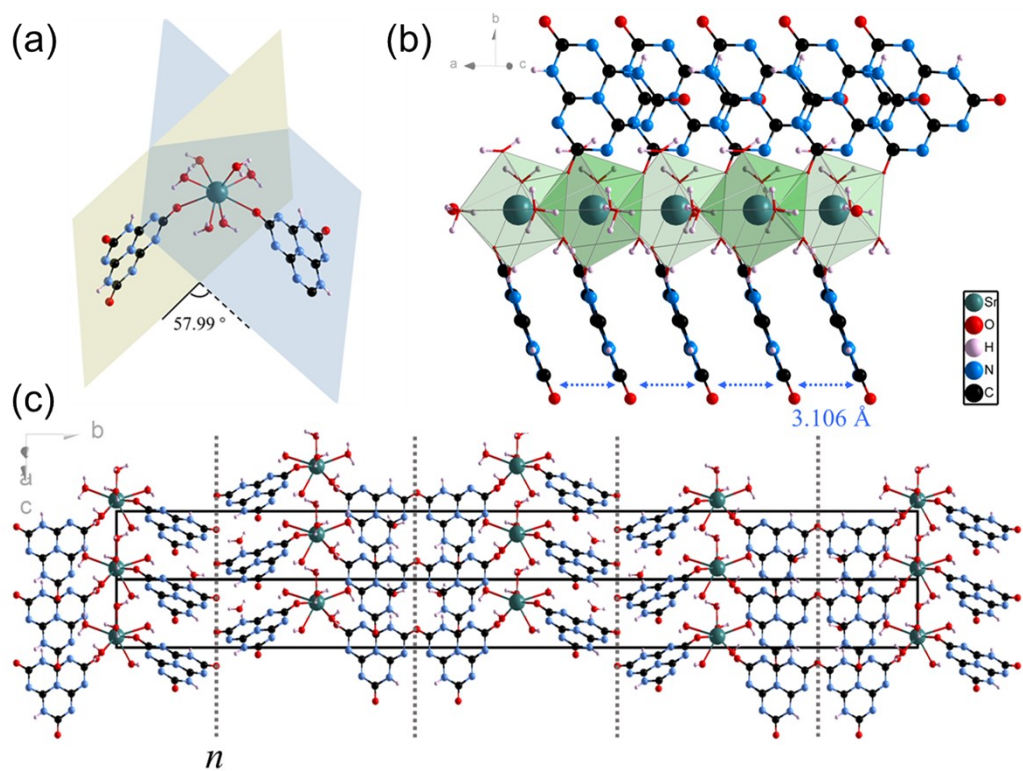

**Figure S2.** Crystal structure of  $\text{Sr}_{0.5}\text{H}_2\text{C}_6\text{N}_7\text{O}_3 \cdot 4\text{H}_2\text{O}$  (II). (a) The coordination environment of  $\text{Sr}^{2+}$ ; (b) the arrangement of  $(\text{H}_2\text{C}_6\text{N}_7\text{O}_3)^-$  anions; (c) the packing diagram of  $\text{Sr}_{0.5}\text{H}_2\text{C}_6\text{N}_7\text{O}_3 \cdot 4\text{H}_2\text{O}$ .

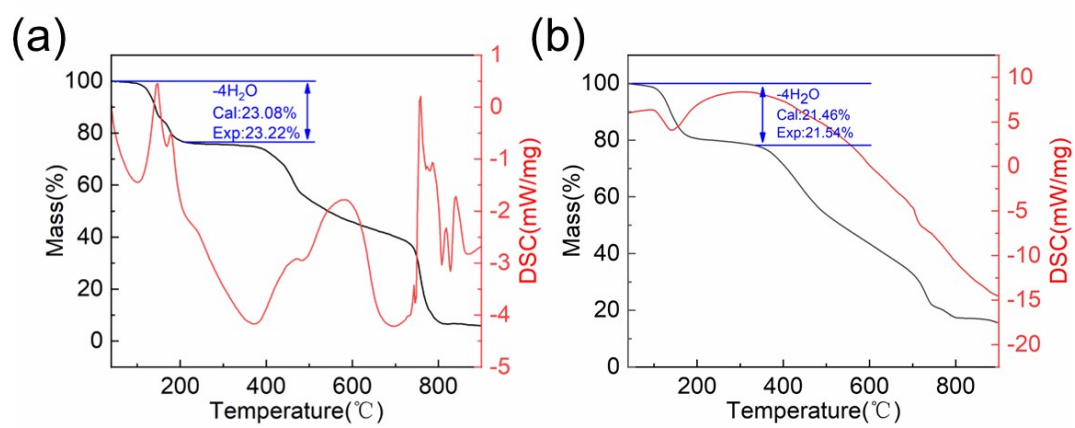

**Figure S3.** Thermal analysis of (a)  $\text{Ca}_{0.5}\text{H}_2\text{C}_6\text{N}_7\text{O}_3 \cdot 4\text{H}_2\text{O}$  and (b)  $\text{Sr}_{0.5}\text{H}_2\text{C}_6\text{N}_7\text{O}_3 \cdot 4\text{H}_2\text{O}$ .

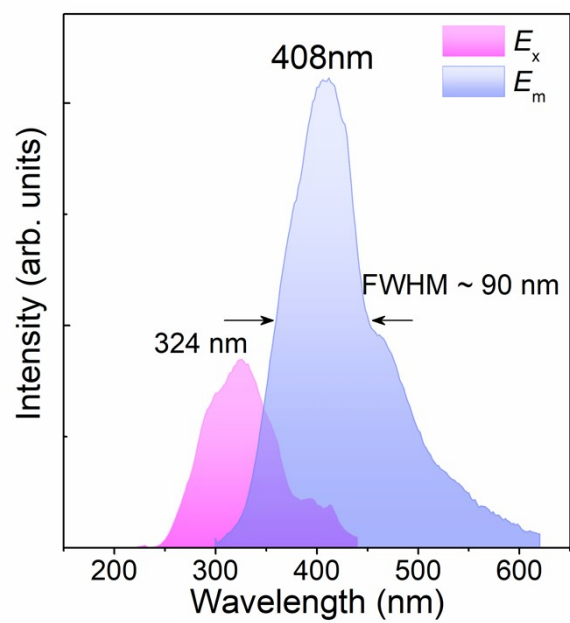

**Figure S4.** Photoluminescent measurement of  $\text{Ca}_{0.5}\text{H}_2\text{C}_6\text{N}_7\text{O}_3 \cdot 4\text{H}_2\text{O}$ .

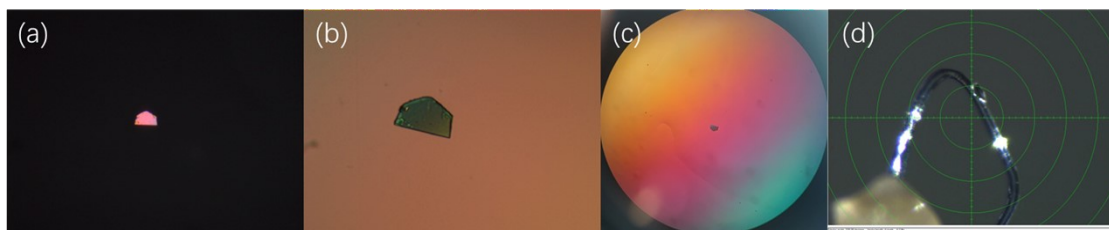

**Figure S5.** Birefringence measurement of  $\text{Ca}_{0.5}\text{H}_2\text{C}_6\text{N}_7\text{O}_3 \cdot 4\text{H}_2\text{O}$ ; (a) the original crystal; (b) the crystal in the extinction state; (c) the crystal interference color observed under the microscope and (d) the photographs of crystal thickness.

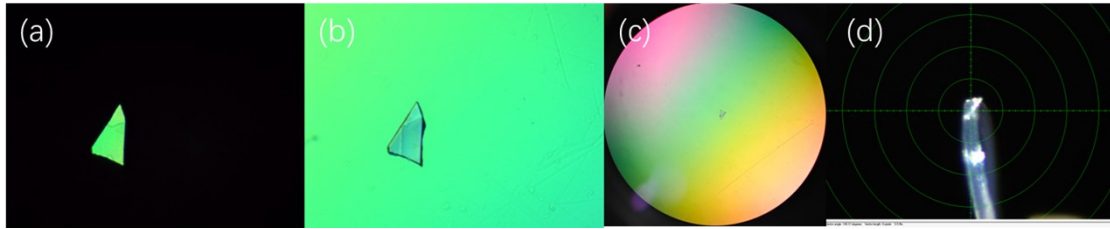

**Figure S6.** Birefringence measurement of  $\text{Sr}_{0.5}\text{H}_2\text{C}_6\text{N}_7\text{O}_3 \cdot 4\text{H}_2\text{O}$ ; (a) the original crystal; (b) the crystal in the extinction state; (c) the crystal interference color observed under the microscope and (d) the photographs of crystal thickness.



(a)

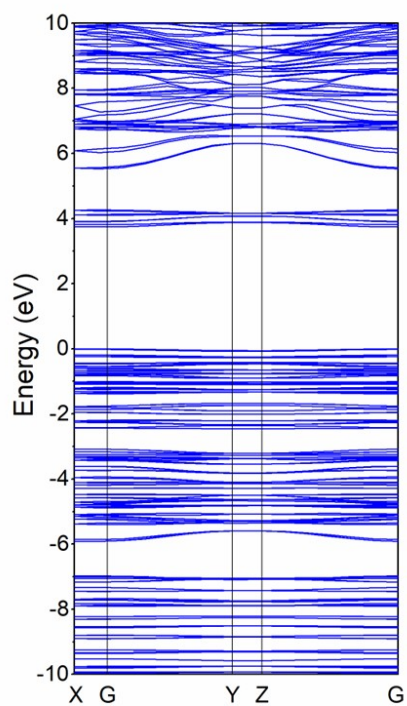

(b)

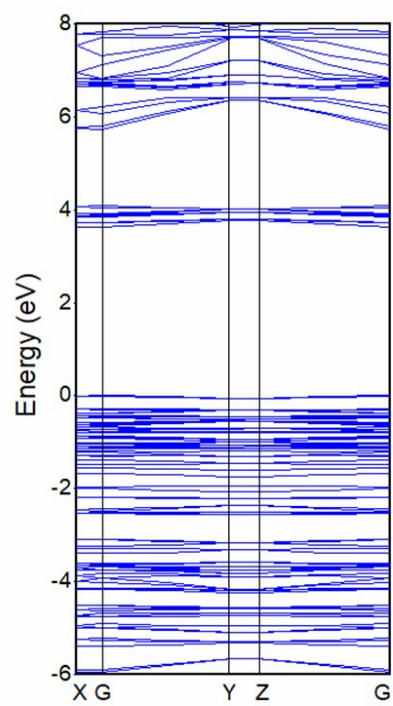

**Figure S7.** Calculated band structure of (a)  $\text{Ca}_{0.5}\text{H}_2\text{C}_6\text{N}_7\text{O}_3 \cdot 4\text{H}_2\text{O}$  and (b)  $\text{Sr}_{0.5}\text{H}_2\text{C}_6\text{N}_7\text{O}_3 \cdot 4\text{H}_2\text{O}$ .

**Table S1.** Fractional atomic coordinates ( $\times 10^4$ ) and equivalent isotropic displacement parameters ( $\text{\AA}^2 \times 10^3$ ) for  $\text{Ca}_{0.5}\text{H}_2\text{C}_6\text{N}_7\text{O}_3 \cdot 4\text{H}_2\text{O}$ .

| Atom | x       | y         | z        | U (eq) [a] |
|------|---------|-----------|----------|------------|
| Ca1  | 7500    | 2500      | 9134(3)  | 25.6(4)    |
| O1   | 5961(3) | 2743.3(6) | 7492(7)  | 28.0(11)   |
| O5   | 9003(3) | 2494.8(6) | 11910(8) | 27.3(10)   |
| O7   | 6676(4) | 2318.5(7) | 6067(7)  | 33.3(12)   |
| O6   | 7634(4) | 2874.0(6) | 10713(8) | 36.7(12)   |
| O2   | 7686(4) | 3747.5(6) | 5099(7)  | 33.2(11)   |
| O4   | 8623(4) | 3462.7(6) | 9344(8)  | 35.6(11)   |
| O3   | 4074(4) | 3228.5(6) | -1910(8) | 33.8(11)   |
| N6   | 7120(4) | 3416.0(7) | 5972(8)  | 23.4(12)   |
| N3   | 6607(4) | 3074.7(7) | 6834(9)  | 23.8(12)   |
| N5   | 5274(4) | 3402.5(8) | 386(8)   | 25.2(12)   |
| N2   | 4656(4) | 3055.4(7) | 1186(9)  | 25.6(12)   |
| N4   | 5932(4) | 3236.7(6) | 3553(8)  | 20.1(11)   |
| N1   | 5331(4) | 2891.3(7) | 4307(9)  | 24.5(11)   |
| N7   | 6452(4) | 3591.7(7) | 2726(8)  | 24.0(12)   |
| C4   | 6560(4) | 3235.4(8) | 5511(11) | 19.7(12)   |
| C6   | 7103(5) | 3593.9(9) | 4611(11) | 23.9(14)   |
| C1   | 5960(5) | 2897.9(8) | 6220(12) | 25.1(14)   |
| C3   | 4632(5) | 3223.8(9) | -189(10) | 25.2(15)   |
| C5   | 5898(5) | 3417.9(9) | 2243(10) | 22.2(13)   |
| C2   | 5296(5) | 3058.5(8) | 3014(10) | 22.5(14)   |

[a]  $U_{\text{eq}}$  is defined as 1/3 of the trace of the orthogonalised  $U_{ij}$  tensor.

**Table S2.** Fractional atomic coordinates ( $\times 10^4$ ) and equivalent isotropic displacement parameters ( $\text{\AA}^2 \times 10^3$ ) for  $\text{Sr}_{0.5}\text{H}_2\text{C}_6\text{N}_7\text{O}_3 \cdot 4\text{H}_2\text{O}$ .

| Atom | x       | y          | z         | U (eq) [a] |
|------|---------|------------|-----------|------------|
| Sr1  | 2500    | 2500       | 850(2)    | 29.6(4)    |
| O1   | 4042(6) | 2748.6(10) | 2585(11)  | 22.0(17)   |
| O4   | 918(6)  | 2494.2(9)  | -1953(12) | 22.4(16)   |
| O2   | 3355(6) | 2313.1(10) | 4082(12)  | 25.7(18)   |
| O7   | 6380(6) | 3463.4(10) | 5737(13)  | 25.4(17)   |
| O5   | 5902(7) | 3233(1)    | 11962(13) | 24.9(17)   |
| O6   | 2295(6) | 3747.7(10) | 5012(12)  | 25.8(18)   |
| N1   | 4646(7) | 2896.7(11) | 5749(16)  | 19.6(18)   |
| N4   | 4054(7) | 3241.8(11) | 6506(13)  | 11.6(18)   |
| O3   | 2643(7) | 2110.4(12) | -728(14)  | 32.4(19)   |
| N5   | 2888(7) | 3402.1(11) | 4120(14)  | 20(2)      |
| N6   | 4701(7) | 3405.3(12) | 9671(14)  | 19(2)      |
| N3   | 5335(8) | 3060.4(13) | 8870(14)  | 17(2)      |
| N2   | 3395(7) | 3078.5(11) | 3259(15)  | 18.4(18)   |
| N7   | 3533(7) | 3592.1(12) | 7353(14)  | 19.9(19)   |
| C3   | 3442(8) | 3239.3(14) | 4569(17)  | 16(2)      |
| C2   | 4704(9) | 3062.2(15) | 7047(17)  | 15(2)      |
| C1   | 4021(8) | 2902.0(15) | 3843(18)  | 19(2)      |
| C6   | 2871(8) | 3593.4(15) | 5478(18)  | 18(2)      |
| C4   | 5358(9) | 3228.0(14) | 10224(15) | 16(2)      |
| C5   | 4091(9) | 3419.8(14) | 7798(16)  | 18(2)      |

[a]  $U_{\text{eq}}$  is defined as 1/3 of the trace of the orthogonalised  $U_{ij}$  tensor.

**Table S3.** Anisotropic displacement parameters( $\text{\AA}^2 \times 10^3$ ) for  $\text{Ca}_{0.5}\text{H}_2\text{C}_6\text{N}_7\text{O}_3 \cdot 4\text{H}_2\text{O}$ .

| Atom | $U_{11}$ | $U_{22}$ | $U_{33}$ | $U_{23}$ | $U_{13}$ | $U_{12}$ |
|------|----------|----------|----------|----------|----------|----------|
| Ca1  | 28.5(9)  | 25.8(9)  | 22.5(9)  | 0        | 0        | -1.6(8)  |
| O1   | 32(3)    | 22(2)    | 30(3)    | 9.7(2)   | -3(2)    | -0.7(19) |
| O5   | 29(2)    | 20(2)    | 34(3)    | 5(2)     | -3(2)    | -1.8(19) |
| O7   | 45(3)    | 24(2)    | 31(3)    | 6(2)     | -9(2)    | -10(2)   |
| O6   | 30(2)    | 42(3)    | 38(3)    | -3(2)    | -5(2)    | 1(2)     |
| O2   | 44(3)    | 20(2)    | 36(3)    | -3(2)    | -3(2)    | -11(2)   |
| O4   | 48(3)    | 27(2)    | 32(3)    | 0(2)     | -10(2)   | 1(2)     |
| O3   | 42(3)    | 33(2)    | 26(3)    | 2(2)     | -13(2)   | -3(2)    |
| N6   | 29(3)    | 19(2)    | 22(3)    | -1(2)    | -7(2)    | -3(2)    |
| N3   | 24(3)    | 17(3)    | 30(3)    | 0(2)     | -8(3)    | 0.5(19)  |
| N5   | 33(3)    | 22(3)    | 21(3)    | 3(2)     | -4(2)    | -3(2)    |
| N2   | 30(3)    | 21(3)    | 26(3)    | 0(2)     | -5(2)    | -4(2)    |
| N4   | 24(3)    | 18(2)    | 19(3)    | -2(2)    | -2(2)    | -1(2)    |
| N1   | 27(3)    | 20(3)    | 26(3)    | 4(2)     | -8(3)    | -3(2)    |
| N7   | 29(3)    | 21(3)    | 21(3)    | 0(2)     | -2(2)    | -6(2)    |
| C4   | 20(3)    | 16(3)    | 23(3)    | 1(3)     | -1(3)    | 2(2)     |
| C6   | 28(3)    | 17(3)    | 27(4)    | -3(3)    | 3(3)     | 1(2)     |
| C1   | 26(3)    | 18(3)    | 32(4)    | 1(3)     | -2(3)    | 1(3)     |
| C3   | 29(3)    | 22(3)    | 26(4)    | -3(3)    | -2(3)    | 2(3)     |
| C5   | 26(3)    | 19(3)    | 22(3)    | 2(2)     | 3(3)     | 1(2)     |
| C2   | 28(3)    | 14(3)    | 16(3)    | -4(3)    | 0(3)     | 0(2)     |

**Table S4.** Anisotropic displacement parameters( $\text{\AA}^2 \times 10^3$ ) for  $\text{Sr}_{0.5}\text{H}_2\text{C}_6\text{N}_7\text{O}_3 \cdot 4\text{H}_2\text{O}$ .

| Atom | $U_{11}$ | $U_{22}$ | $U_{33}$ | $U_{23}$ | $U_{13}$ | $U_{12}$ |
|------|----------|----------|----------|----------|----------|----------|
| Sr1  | 32.2(8)  | 30.4(7)  | 26.3(7)  | 0        | 0        | -0.6(8)  |
| O1   | 26(4)    | 17(3)    | 23(4)    | -12(3)   | -3(3)    | 5(3)     |
| O4   | 21(4)    | 20(3)    | 25(4)    | -6(3)    | 1(3)     | 3(3)     |
| O2   | 28(4)    | 22(4)    | 27(4)    | -2(3)    | -2(3)    | 8(3)     |
| O7   | 35(4)    | 19(3)    | 22(4)    | -2(4)    | -10(4)   | 1(3)     |
| O5   | 39(5)    | 28(4)    | 18(4)    | -3(3)    | -12(3)   | 4(4)     |
| O6   | 33(5)    | 15(3)    | 30(4)    | 7(3)     | 0(3)     | 13(3)    |
| N1   | 26(5)    | 13(4)    | 20(4)    | -4(4)    | -5(4)    | 5(3)     |
| N4   | 10(4)    | 10(4)    | 14(4)    | -1(3)    | -4(3)    | 3(3)     |
| O3   | 32(5)    | 34(4)    | 31(5)    | 2(4)     | 16(4)    | -2(4)    |
| N5   | 27(5)    | 15(4)    | 17(5)    | 2(4)     | -10(4)   | 4(4)     |
| N6   | 31(5)    | 14(4)    | 13(4)    | -5(3)    | -6(4)    | 7(4)     |
| N3   | 21(5)    | 14(4)    | 17(5)    | 0(3)     | -4(4)    | 3(3)     |
| N2   | 23(5)    | 17(4)    | 15(4)    | -4(4)    | -3(4)    | 0(3)     |
| N7   | 23(5)    | 18(4)    | 19(4)    | 1(4)     | -3(4)    | 4(4)     |
| C3   | 13(5)    | 19(5)    | 17(5)    | 4(4)     | 2(4)     | -3(4)    |
| C2   | 16(5)    | 15(5)    | 13(5)    | 3(4)     | 7(4)     | 0(4)     |
| C1   | 10(5)    | 19(5)    | 30(6)    | 4(5)     | -3(4)    | 1(4)     |
| C6   | 13(5)    | 19(5)    | 23(6)    | 3(4)     | 2(4)     | 1(4)     |
| C4   | 18(5)    | 15(5)    | 13(5)    | -2(4)    | -1(4)    | 2(4)     |
| C5   | 22(6)    | 14(5)    | 19(5)    | -1(4)    | 2(4)     | 0(4)     |

**Table S5.** Selected bond lengths for  $\text{Ca}_{0.5}\text{H}_2\text{C}_6\text{N}_7\text{O}_3 \cdot 4\text{H}_2\text{O}$ .

| Bond                | Length (Å) | Bond  | Length (Å) |
|---------------------|------------|-------|------------|
| Ca1-O1 <sup>1</sup> | 2.566(4)   | N3-C4 | 1.287(7)   |
| Ca1-O1              | 2.566(4)   | N3-C1 | 1.397(7)   |
| Ca1-O5 <sup>1</sup> | 2.424(4)   | N5-C3 | 1.399(7)   |
| Ca1-O5              | 2.424(4)   | N5-C5 | 1.334(7)   |
| Ca1-O7 <sup>1</sup> | 2.368(5)   | N2-C3 | 1.343(7)   |
| Ca1-O7              | 2.368(5)   | N2-C2 | 1.327(8)   |
| Ca1-O6 <sup>1</sup> | 2.544(4)   | N4-C4 | 1.384(7)   |
| Ca1-O6              | 2.544(4)   | N4-C5 | 1.385(7)   |
| O1-C1               | 1.236(7)   | N4-C2 | 1.387(7)   |
| O2-C6               | 1.221(6)   | N1-C1 | 1.363(8)   |
| O3-C6               | 1.220(7)   | N1-C2 | 1.308(7)   |
| N6-C4               | 1.343(7)   | N7-C6 | 1.362(8)   |
| N6-C6               | 1.385(7)   | N7-C5 | 1.306(7)   |

<sup>1</sup>3/2-X,

1/2-Y,

+Z

**Table S6.** Selected bond lengths for Sr<sub>0.5</sub>H<sub>2</sub>C<sub>6</sub>N<sub>7</sub>O<sub>3</sub>·4H<sub>2</sub>O.

| Bond                | Length (Å) | Bond  | Length (Å) |
|---------------------|------------|-------|------------|
| Sr1-O1 <sup>1</sup> | 2.635(7)   | N4-C3 | 1.376(12)  |
| Sr1-O1              | 2.635(7)   | N4-C2 | 1.414(12)  |
| Sr1-O4 <sup>1</sup> | 2.529(7)   | N4-C5 | 1.373(11)  |
| Sr1-O4              | 2.529(7)   | N5-C3 | 1.350(12)  |
| Sr1-O2 <sup>1</sup> | 2.497(7)   | N5-C6 | 1.370(13)  |
| Sr1-O2              | 2.497(7)   | N6-C4 | 1.410(12)  |
| Sr1-O3 <sup>1</sup> | 2.653(8)   | N6-C5 | 1.345(13)  |
| Sr1-O3              | 2.653(8)   | N3-C2 | 1.331(13)  |
| O1-C1               | 1.234(11)  | N3-C4 | 1.340(12)  |
| O5-C4               | 1.232(12)  | N2-C3 | 1.291(12)  |
| O6-C6               | 1.227(11)  | N2-C1 | 1.390(12)  |
| N1-C2               | 1.311(13)  | N7-C6 | 1.377(13)  |
| N1-C1               | 1.368(14)  | N7-C5 | 1.306(12)  |

<sup>1</sup>1/2-X, 1/2-Y, +Z

**Table S7.** Selected bond angles for  $\text{Ca}_{0.5}\text{H}_2\text{C}_6\text{N}_7\text{O}_3 \cdot 4\text{H}_2\text{O}$ .

| Angle                                | (°)        | Angle     | (°)      |
|--------------------------------------|------------|-----------|----------|
| O1 <sup>1</sup> -Ca1-O1              | 135.0(2)   | C1-O1-Ca1 | 135.0(4) |
| O5-Ca1-O1                            | 141.59(13) | C4-N6-C6  | 123.9(5) |
| O5 <sup>1</sup> -Ca1-O1 <sup>1</sup> | 74.95(14)  | C5-N5-C3  | 124.1(5) |
| O5 <sup>1</sup> -Ca1-O5              | 93.5(2)    | C2-N2- C3 | 120.3(5) |
| O5-Ca1-O6 <sup>1</sup>               | 77.18(14)  | O2-C6-N6  | 119.6(6) |
| O5-Ca1-O6                            | 73.33(13)  | O1-C1-N3  | 117.8(6) |
| O7-Ca1-O1 <sup>1</sup>               | 72.76(15)  | O3-C3-N5  | 118.6(5) |
| O7 <sup>1</sup> -Ca1-O1 <sup>1</sup> | 72.80(15)  | N6-C4-N4  | 115.5(5) |
| O7-Ca1-O5                            | 145.25(14) | N3-C4-N6  | 121.3(5) |
| O7-Ca1-O5                            | 103.82(16) | N7-C6-N6  | 119.0(5) |
| O7 <sup>1</sup> -Ca1-O7 <sup>1</sup> | 78.5(2)    | N1-C1-N3  | 122.7(5) |
| O7-Ca1-O6                            | 139.49(15) | N2-C3-N5  | 118.3(5) |
| O7-Ca1-O6 <sup>1</sup>               | 79.32(15)  | N5-C5-N4  | 115.2(5) |
| O6 <sup>1</sup> -Ca1-O1 <sup>1</sup> | 68.42(13)  | N7-C5-N5  | 121.3(5) |
| O6-Ca1-O1 <sup>1</sup>               | 130.68(13) | C2-N1-C1  | 119.2(5) |
| O6 <sup>1</sup> -Ca1-O6              | 136.4(2)   | O2-C6-N7  | 121.4(5) |

<sup>1</sup>3/2-X, 1/2-Y, +Z



**Table S8.** Selected bond angles for Sr<sub>0.5</sub>H<sub>2</sub>C<sub>6</sub>N<sub>7</sub>O<sub>3</sub>·4H<sub>2</sub>O.

| Angle                                | (°)        | Angle     | (°)      |
|--------------------------------------|------------|-----------|----------|
| O1 <sup>1</sup> -Sr1-O1              | 133.2(3)   | C1-O1-Sr1 | 134.6(7) |
| O1-Sr1-O3                            | 130.9(2)   | C2-N1-C1  | 120.6(8) |
| O1 <sup>1</sup> -Sr1-O3              | 68.3 (2)   | C3-N4-C2  | 118.4(8) |
| O4 <sup>1</sup> -Sr1-O1              | 74.8(2)    | C5-N4-C2  | 121.0(8) |
| O4 <sup>1</sup> -Sr1-O1 <sup>1</sup> | 142.36(19) | C3-N5-C6  | 124.7(9) |
| O4-Sr1-O3 <sup>1</sup>               | 78.2(2)    | C5-N6-C4  | 123.5(8) |
| O2-Sr1-O1                            | 72.0(2)    | N5-C3-N4  | 114.8(8) |
| O2-Sr1-O4 <sup>1</sup>               | 103.0(2)   | N2-C3-N4  | 123.4(9) |
| O2 <sup>1</sup> -Sr1-O4              | 144.8(2)   | N2-C3-N5  | 121.9(9) |
| O2-Sr1-O2 <sup>1</sup>               | 77.5(2)    | O1-C1-N1  | 119.0(8) |
| O2 <sup>1</sup> -Sr1-O3 <sup>1</sup> | 138.4(2)   | O1-C1-N2  | 119.4(9) |
| O2-Sr1-O3                            | 79.1(2)    | N1-C1-N2  | 121.6(9) |
| O3-Sr1-O3 <sup>1</sup>               | 138.0(4)   | N3-C4-N6  | 118.5(8) |
| O2 <sup>1</sup> -Sr1-O3 <sup>1</sup> | 79.1(2)    | N6-C5-N4  | 115.9(8) |
| O2-Sr1-O3 <sup>1</sup>               | 138.4(2)   | C7-C5-N4  | 123.7(9) |
| O2 <sup>1</sup> -Sr1-O4              | 103.0(2)   | O7-C5-N7  | 120.3(9) |

<sup>1</sup>1/2-X, 1/2-Y, +Z
